# Supplementary material
Source: Springer Nature journal article supplement (https://www.springermedizin.de/resource/supplementary/13002_2014_405_MOESM4_ESM.pdf/9626838)

**ALBANIANS**

**MACEDONIANS**

**Food plant reports**

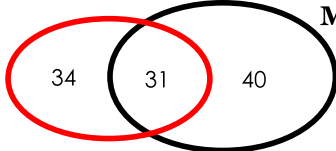

**Medicinal plant reports**

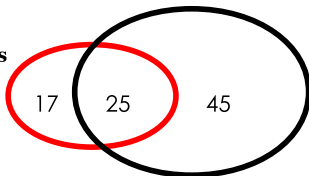

**Veterinary plant reports**

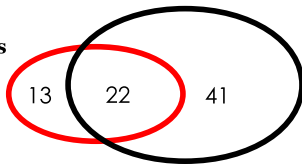

Supplement: MOESM4 [file 9626838]
